# Supplementary material for: The generally recognized as safe (GRAS) microalgae Haematococcus pluvialis (wet) as a multifunctional additive for coloring and improving the organoleptic and functional properties of foods
Source: Royal Society of Chemistry journal article supplement (doi:10.1039/d3fo01028g), 2023-01-01
Supplement: d3fo01028g1.pdf [file d3fo01028g1.pdf]

1  
2  
3  
4  
5  
6  
7  
8  
9  
10  
11  
12  
13  
14  
15  
16  
17  
18  
19  
20  
21  
22  
23

**Supplementary Material**

**The Generally Recognized as Safe (GRAS) Microalgae *Haematococcus pluvialis* Wet as a Multifunctional Additive for Coloring and Improving the Organoleptic and Functional Properties of Foods**

**Aly Castillo<sup>1,2,3\*</sup>, Tiane C. Finimundy<sup>4,5</sup>, Sandrina A. Heleno<sup>4,5</sup>, Paula Rodrigues<sup>4,5</sup>, Filipa A. Fernandes<sup>4,5</sup>, Simón Pereira<sup>6</sup>, Marta Lores<sup>2</sup>, Lillian Barros<sup>4,5</sup>, Carmen Garcia-Jares<sup>1,2</sup>**

<sup>1</sup>CRETUS, Department of analytical Chemistry, Nutrition and Food Science, Universidade de Santiago de Compostela, E-15782, Santiago de Compostela, Spain.

<sup>2</sup>LIDSA, Department of Analytical Chemistry Nutrition and Food Science, Universidade de Santiago de Compostela, E-15782, Santiago de Compostela, Spain.

<sup>3</sup>i-Grape Laboratory, Edificio Emprendia, Avda Mestre Mateo s/n, 15702, Santiago de Compostela, Spain

<sup>4</sup>Centro de Investigação de Montanha (CIMO), Instituto Politécnico de Bragança, Campus de Santa Apolónia, Bragança, 5300-253, Portugal.

<sup>5</sup>Laboratório Associado para a Sustentabilidade e Tecnologia em Regiões de Montanha (SusTEC), Instituto Politécnico de Bragança. Campus de Santa Apolónia, 5300-253 Bragança, Portugal.

<sup>6</sup>Institute of Aquaculture and Department of Microbiology and Parasitology, Universidade de Santiago de Compostela, Campus Vida, E-15782, Santiago de Compostela, Spain.

**Corresponding author:** AC. [alyjesus.castillo.zamora@usc.es](mailto:alyjesus.castillo.zamora@usc.es)

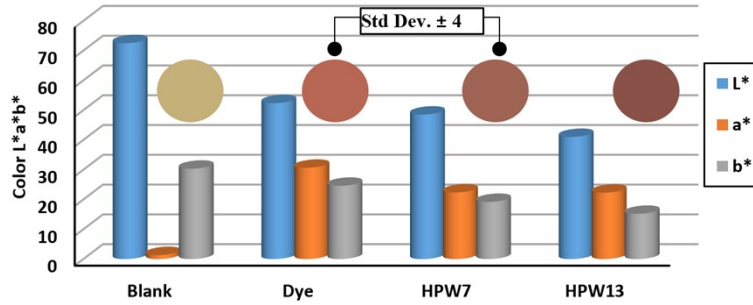

25

26 **Figure S1.** Comparative analysis of the color profile (Lab) of the *filloas*. Blank: control  
 27 group; Dye: addition of synthetic colorant; HPW7 and HPW13: addition of *H. pluvialis* wet  
 28 at concentrations of 7% and 13% ( $\text{g}_{\text{microalgaDW}} \cdot \text{g}^{-1}_{\text{flour}}$ ) respectively.

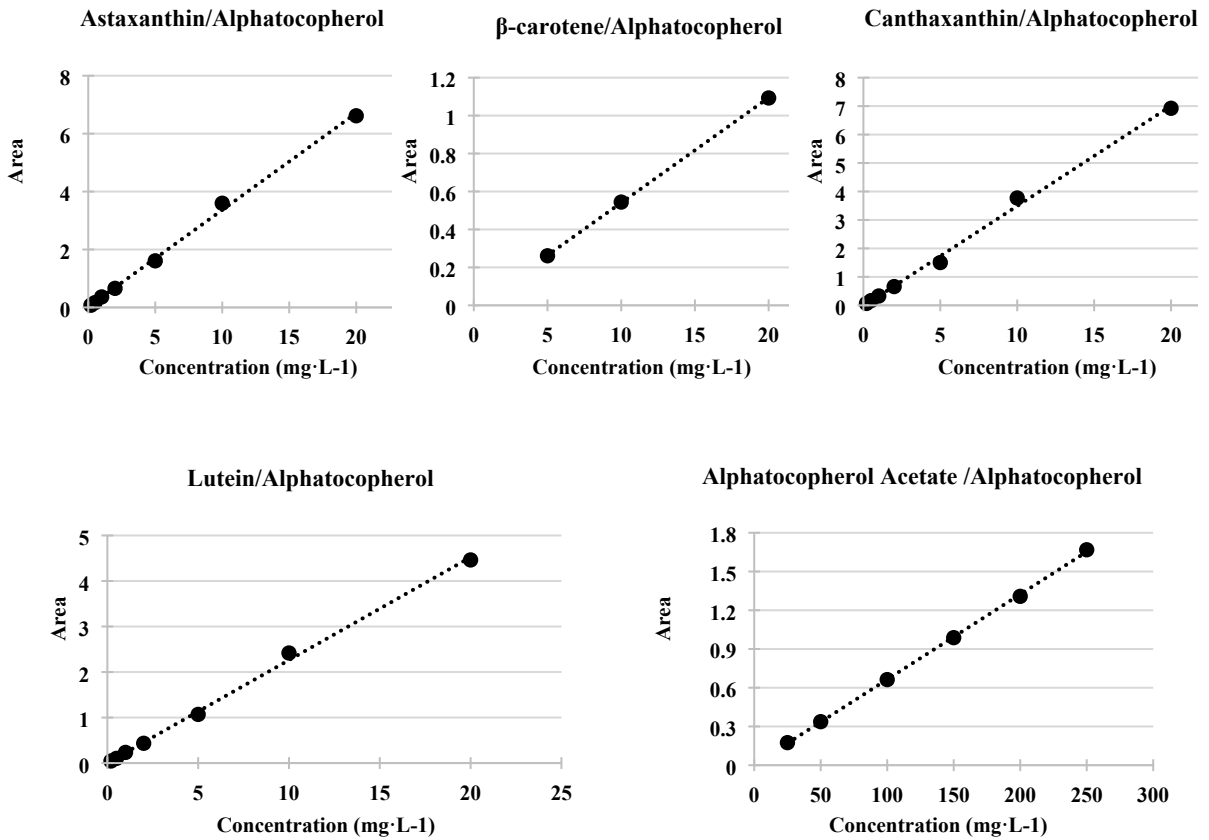

29 **Figure S2.** Calibration curves of the carotenoid, internal and subrogate standards by HPLC-  
 30 DAD used for the quantification of the *filloas* samples. Linearity ranges, equation of the  
 31 curve and  $R^2$

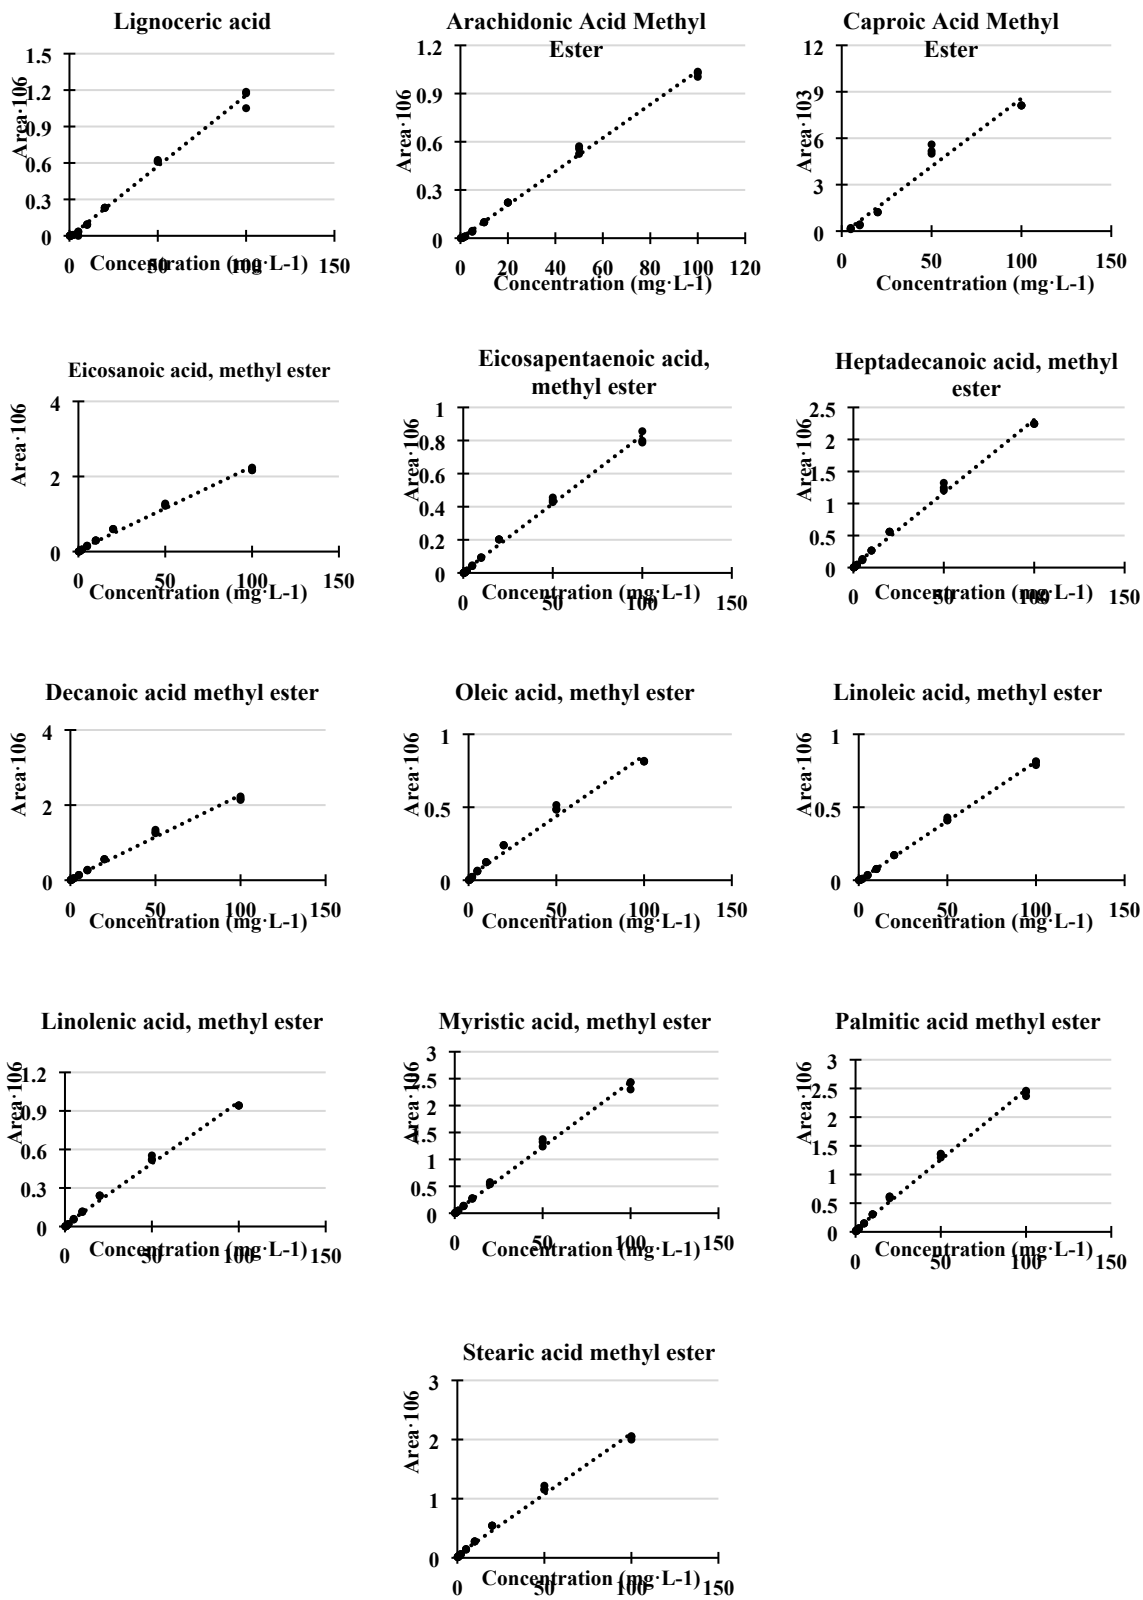

32 **Figure S3.** Calibration curves of the fatty acids standards by GC-MS used for the  
 33 quantification of the *filloas* samples. Linearity ranges, equation of the curve and R<sup>2</sup>

34 **Table S1.** Respective chemical composition of the analyzed commercial dye

| Function                             | E Code | Compound          | CAS        | Formula                                                                                      |
|--------------------------------------|--------|-------------------|------------|----------------------------------------------------------------------------------------------|
| Colorant                             | E122   | Azorubine         | 3567-69-9  | C <sub>20</sub> H <sub>12</sub> N <sub>2</sub> Na <sub>2</sub> O <sub>7</sub> S <sub>2</sub> |
|                                      | E102   | Tartrazine        | 1934-21-0  | C <sub>16</sub> H <sub>9</sub> N <sub>4</sub> Na <sub>3</sub> O <sub>9</sub> S <sub>2</sub>  |
| <b>Common additives in both dyes</b> |        |                   |            |                                                                                              |
| Acidulant                            | E330   | Citric Acid       | 77-92-9    | C <sub>6</sub> H <sub>8</sub> O <sub>7</sub>                                                 |
| Preservative                         | E202   | Potassium Sorbate | 24634-61-5 | C <sub>6</sub> H <sub>7</sub> O <sub>2</sub> K                                               |

35

36 **Table S2.** Studied compounds in *filloa* samples for characterization and quantification of  
37 their bioactive profile. CAS numbers, purity, and suppliers

| Acronym                  | Common name                   | CAS        | Purity (%) | Molecular Formula                              | Company                   |
|--------------------------|-------------------------------|------------|------------|------------------------------------------------|---------------------------|
| <b>CAROTENOID</b>        |                               |            |            |                                                |                           |
|                          | Astaxanthin                   | 472-61-7   | 98.1       | C <sub>40</sub> H <sub>52</sub> O <sub>4</sub> | <sup>1</sup> BIOSYNTH     |
|                          | Lutein                        | 127-40-2   | 98.9       | C <sub>40</sub> H <sub>56</sub> O <sub>2</sub> | <sup>2</sup> BIOPURIFY    |
|                          | Canthaxanthin                 | 514-78-3   | 98.2       | C <sub>40</sub> H <sub>52</sub> O <sub>2</sub> | <sup>3</sup> EHRENSTORFER |
|                          | $\beta$ -Carotene             | 7235-40-7  | 99.7       | C <sub>40</sub> H <sub>56</sub>                | <sup>4</sup> ALFA         |
| <b>FATTY ACIDS</b>       |                               |            |            |                                                |                           |
| C10:0                    | Decanoic                      | 334-48-5   | 99.5       | C <sub>10</sub> H <sub>20</sub> O <sub>2</sub> | <sup>5</sup> SIGMA        |
| C14:0                    | Myristic                      | 544-63-8   | 99.7       | C <sub>14</sub> H <sub>28</sub> O <sub>2</sub> | <sup>6</sup> TCI          |
| C16:0                    | Palmitic                      | 57-10-3    | 99.9       | C <sub>16</sub> H <sub>32</sub> O <sub>2</sub> | <sup>7</sup> FLUOROCHEM   |
| C17:0                    | Heptadecanoic                 | 506-12-7   | 98.7       | C <sub>17</sub> H <sub>34</sub> O <sub>2</sub> | <sup>8</sup> GLENTHAM     |
| C18:0                    | Stearic                       | 57-11-4    | 99.4       | C <sub>18</sub> H <sub>36</sub> O <sub>2</sub> | <sup>6</sup> TCI          |
| C18:1                    | Oleic                         | 112-80-1   | 99.6       | C <sub>18</sub> H <sub>34</sub> O <sub>2</sub> | <sup>5</sup> SIGMA        |
| C18:2                    | Linoleic                      | 60-33-3    | 99.2       | C <sub>18</sub> H <sub>32</sub> O <sub>2</sub> | <sup>5</sup> SIGMA        |
| C18:3                    | Linolenic ( $\gamma+\alpha$ ) | 463-40-1   | 98.5       | C <sub>18</sub> H <sub>30</sub> O <sub>2</sub> | <sup>5</sup> SIGMA        |
| C20:0                    | Arachidic                     | 506-30-9   | 99.9       | C <sub>20</sub> H <sub>40</sub> O <sub>2</sub> | <sup>4</sup> ALFA         |
| C20:5                    | Eicosapentaenoic              | 10417-94-4 | 98.3       | C <sub>20</sub> H <sub>30</sub> O <sub>2</sub> | <sup>1</sup> BIOSYNTH     |
| <b>INTERNAL STANDARD</b> |                               |            |            |                                                |                           |
| C19:0                    | Nonadecanoic Acid             | 646-30-0   | 99.5       | C <sub>19</sub> H <sub>38</sub> O <sub>2</sub> | <sup>6</sup> TCI          |
| C22:0                    | Lignoceric Acid               | 557-59-5   | 98.9       | C <sub>24</sub> H <sub>48</sub> O <sub>2</sub> | <sup>6</sup> TCI          |
|                          | Alpha tocopherol              | 59-02-9    | 97.0       | C <sub>29</sub> H <sub>50</sub> O <sub>2</sub> | <sup>5</sup> SIGMA        |
|                          | Alpha tocopherol acetate      | 58-95-7    | 99.1       | C <sub>31</sub> H <sub>52</sub> O <sub>3</sub> | <sup>4</sup> ALFA         |

38 <sup>1</sup> Biosynth Carbosynth (BIOSYNTH) (West Berkshire, England); <sup>2</sup> Biopurify Phytochemicals Ltd.  
39 (BIOPURIFY) (Sichuan, China); <sup>3</sup> Dr. Ehrenstorfer (Augsburg, Germany); <sup>4</sup> Alfa Aesar (Karlsruhe,  
40 Germany); <sup>5</sup> Sigma-Aldrich Chemie GmbH (SIGMA) (Steinheim, Germany); <sup>6</sup> Tokyo Chemical Industry  
41 (TCI) (Tokyo, Japan); <sup>7</sup> Fluorochem Ltd. (FLUOROCHEM) (Derbyshire, England); <sup>8</sup> Glentham Life Sciences  
42 Ltd. (GLENTHAM) (Wiltshire, England)

43
